# Supplementary material for: An explainable machine-learning approach for revealing the complex synthesis path–property relationships of nanomaterials
Source: Royal Society of Chemistry journal article supplement (doi:10.1039/d3nr02273k), 2023-01-01
Supplement: d3nr02273k1.pdf [file d3nr02273k1.pdf]

## Supplementary Information For

# Explainable Machine-Learning Approach for Revealing Complex Synthesis Path–Property Relationships of Nanomaterials

Kun Jin <sup>a, ‡</sup>, Wentao Wang <sup>a, ‡</sup>, Guangpei Qi <sup>a, ‡</sup>, Xiaohong Peng <sup>b, ‡</sup>, Haonan Gao <sup>a</sup>, Hongjiang Zhu <sup>a</sup>, Xin He <sup>a</sup>, Haixia Zou <sup>a</sup>, Lin Yang <sup>a</sup>, Junjie Yuan <sup>a</sup>, Liyuan Zhang <sup>c</sup>, Hong Chen <sup>d,\*</sup> and Xiangmeng Qu <sup>a,\*</sup>

a Key Laboratory of Sensing Technology and Biomedical Instruments of Guangdong Province and School of Biomedical Engineering, Sun Yat-Sen University, Shenzhen 518107, China

b YueYang Central Hospital, YueYang 414000, China

c School of Petroleum Engineering, State Key Laboratory of Heavy Oil Processing China University of Petroleum (East China), Qingdao, 266580, China

d Pen-Tung Sah Institute of Micro-Nano Science and Technology, Xiamen University, Xiamen, Fujian, China 361005

## Supplemental Data Items

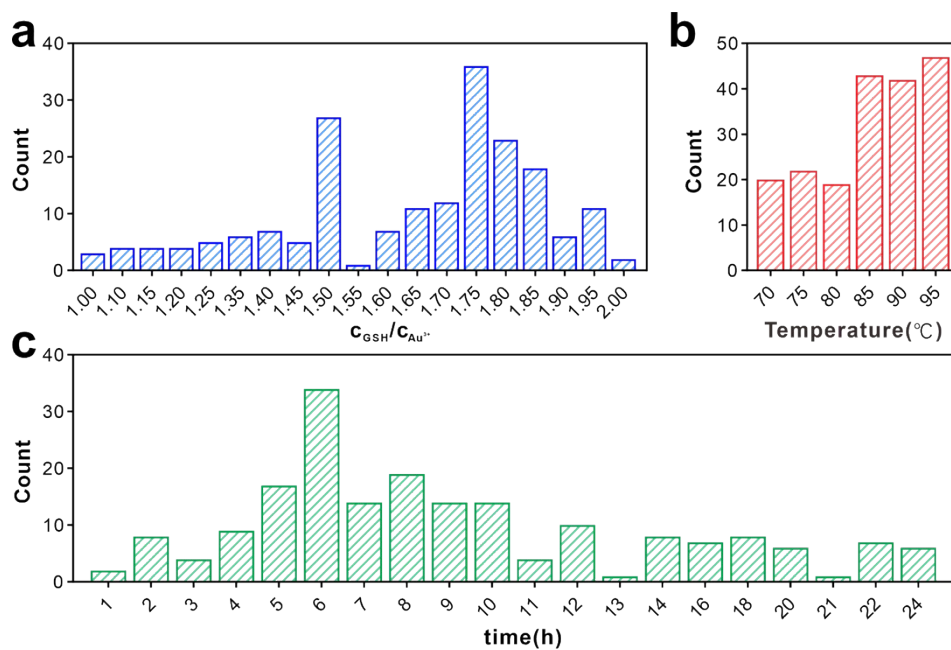

**Fig S1. Histogram of the overall dataset over each feature.** (a) The histogram of the temperature. (b) The histogram of the concentration of GSH. (c) The histogram of the time.

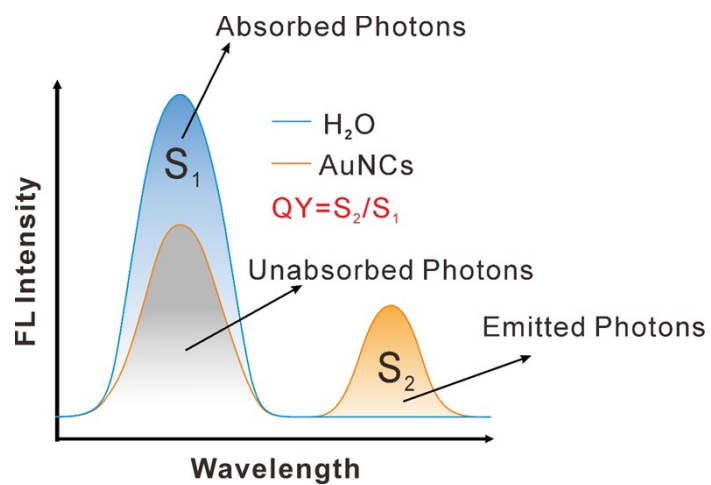

**Fig S2. Schematic illustration of the calculation of absolute fluorescence QYs of AuNC.**

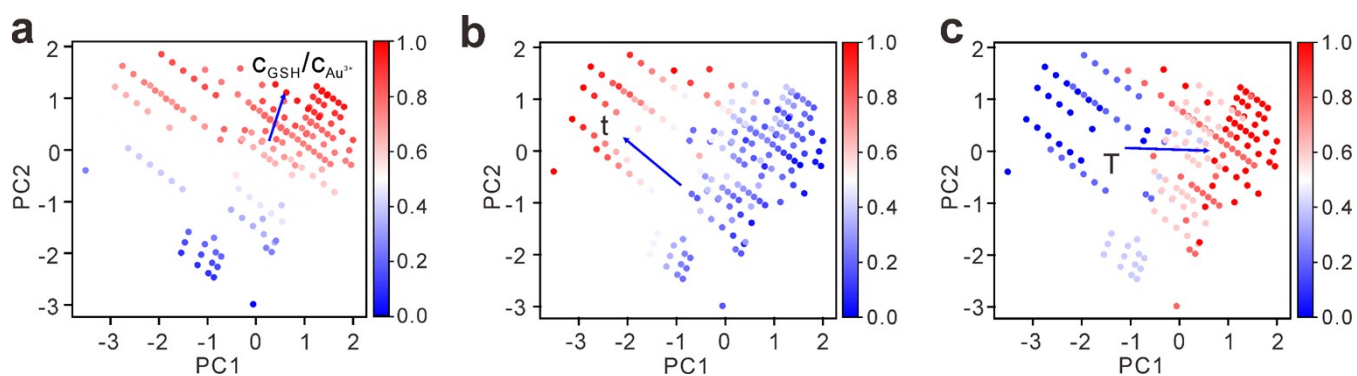

**Fig S3. PCA analysis of the AuNCs data with 3 principal components. a**, PCA analysis of QY data with the thiol-to-metal molar ratios ( $C_{GSH}/C_{Au^{3+}}$ ) synthetic parameter. **b**, PCA analysis of QY data with the reaction time ( $t$ ) synthetic parameter. **c**, PCA analysis of QY data with the reaction temperature ( $T$ ) synthetic parameter. The arrows represent the distribution direction of the parameters.

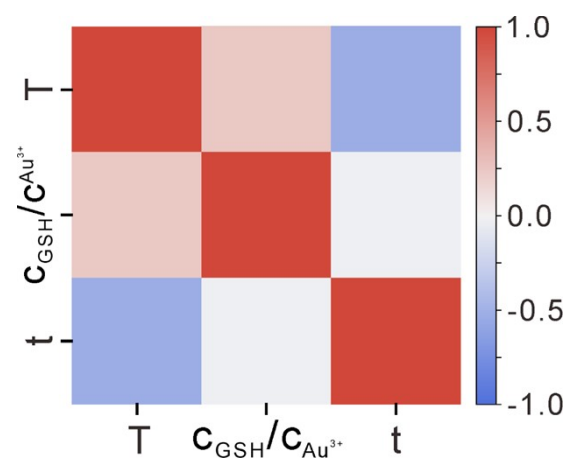

**Fig S4. Pearson's correlation coefficient matrix of different synthetic parameters.**

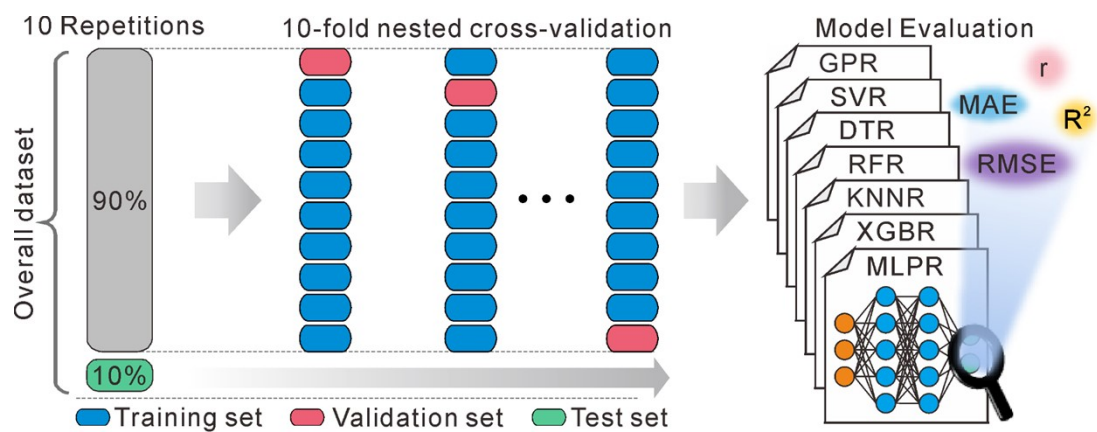

**Fig S5. Scheme workflow for machine learning regression model's selection using nested cross-validation.**

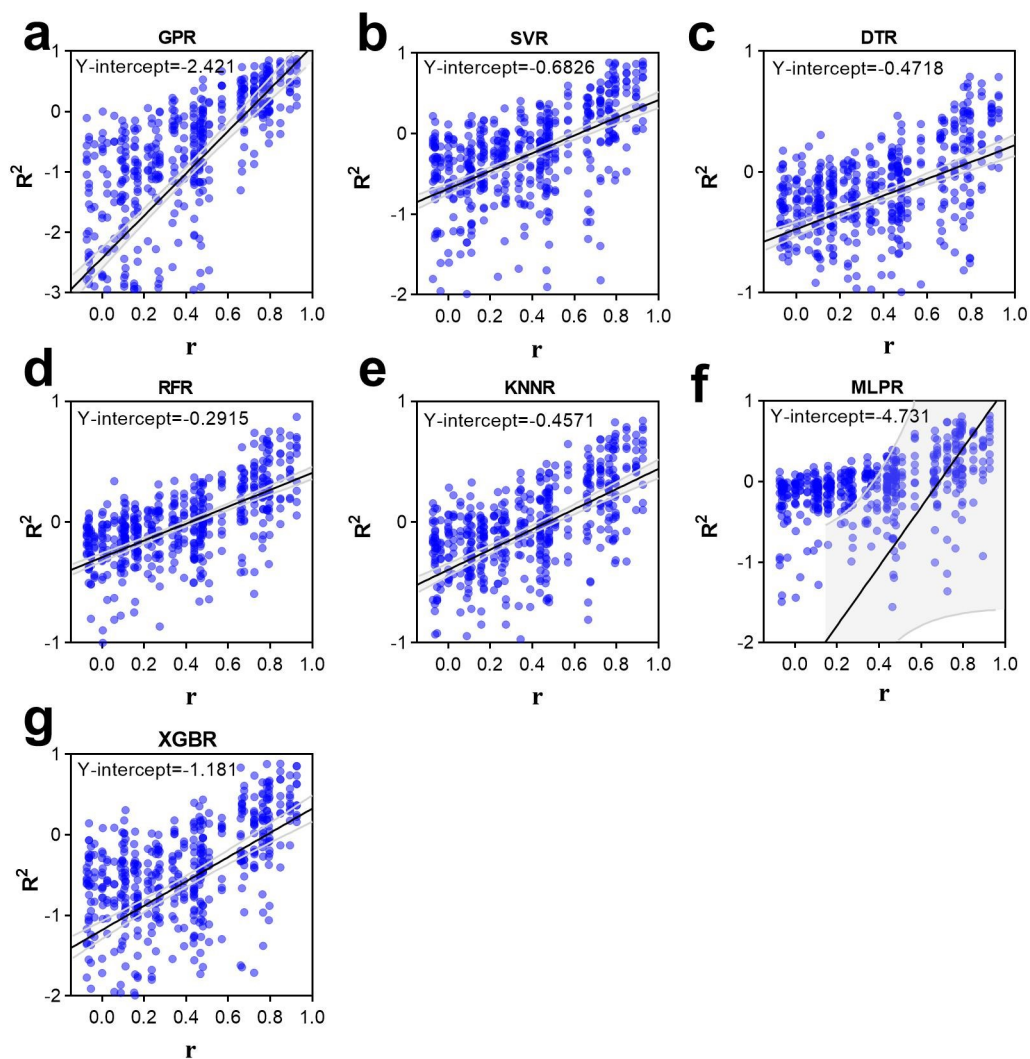

**Fig S6.** Overfitting test using a permutation test. The Y-axis represents the coefficient of determinations ( $R^2$ ) of the models trained by the whole dataset after permutating QYs, and the X-axis represents the corresponding Pearson's correlation coefficients ( $r$ ) of the raw QYs and permuted QYs. The linear regressions on the  $r$  values and the corresponding  $R^2$  values indicate that the model is not overfitting (intercept  $< 0.05$ ).

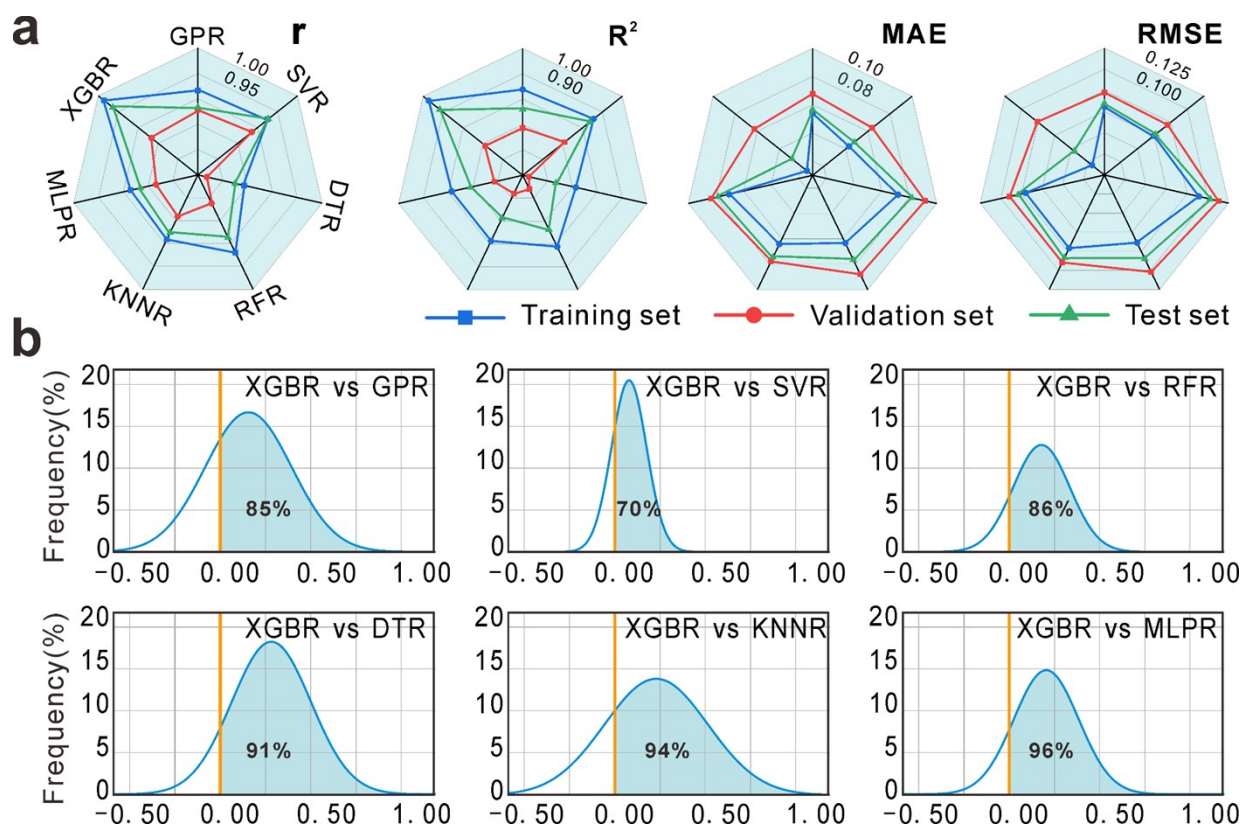

**Fig S7. a**, Radar-map of the mean of  $r$ ,  $R^2$ , MAE, and RMSE. **b**, Bayesian correlated t-tests, revealing comparison results of 10 repetitions of cross-validation between XGBR and the other six candidate models in inferring QY. XGBR outperforms the other six candidate models significantly.



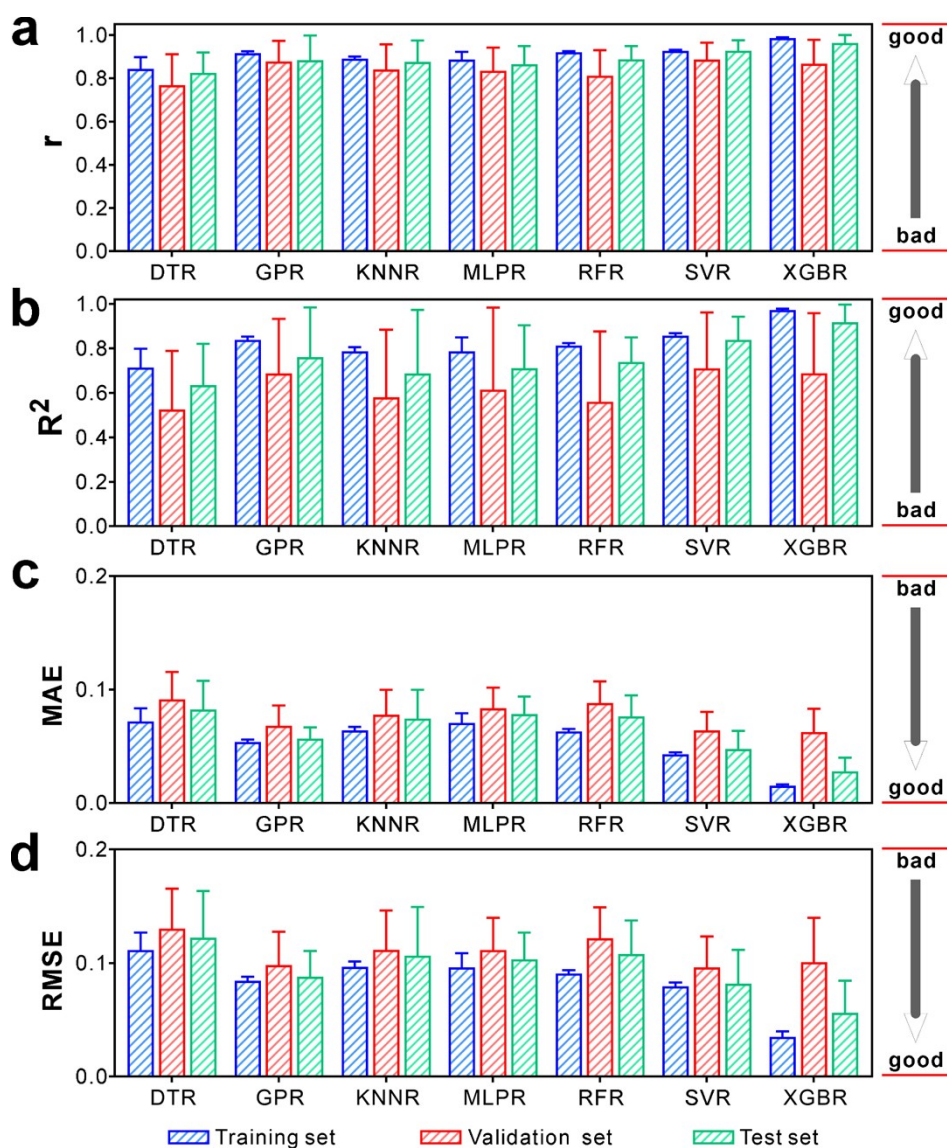

**Fig S8.** Model evaluation for inferring QY from the parameters more precisely. Histograms of the seven candidate models' performance indexes of the 10 repetitions  $\times$  10-fold cross-validation, including Pearson's correlation coefficient ( $r$ ), coefficient of determination ( $R^2$ ), mean absolute error (MAE), and root mean square error (RMSE). All values were expressed as mean  $\pm$  SD (n = 10 repetitions  $\times$  10 folds = 100).

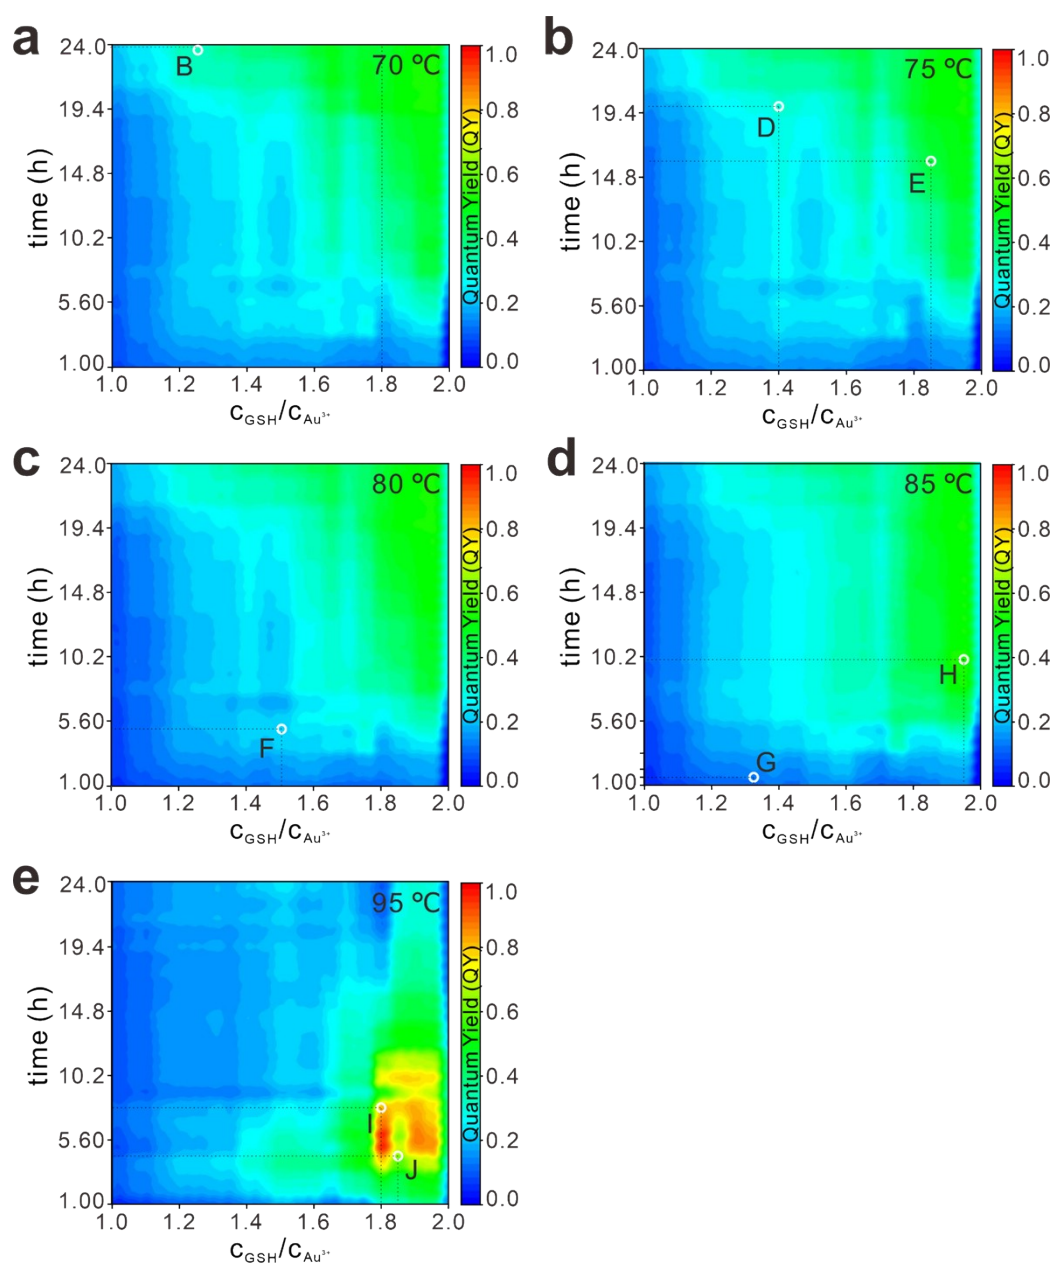

**Fig S9.** The synthetic phase diagram determined by the trained XGBR model at different temperatures 70°C(a), 75°C(b), 80°C(c), 85°C(d), and 95°C(e). The region with red color indicates that GSH-AuNC with higher fluorescence QY can be synthesized under this synthetic parameter. In contrast, the region with blue color indicates that GSH-AuNC with lower fluorescence QY can be synthesized under this synthetic parameter.

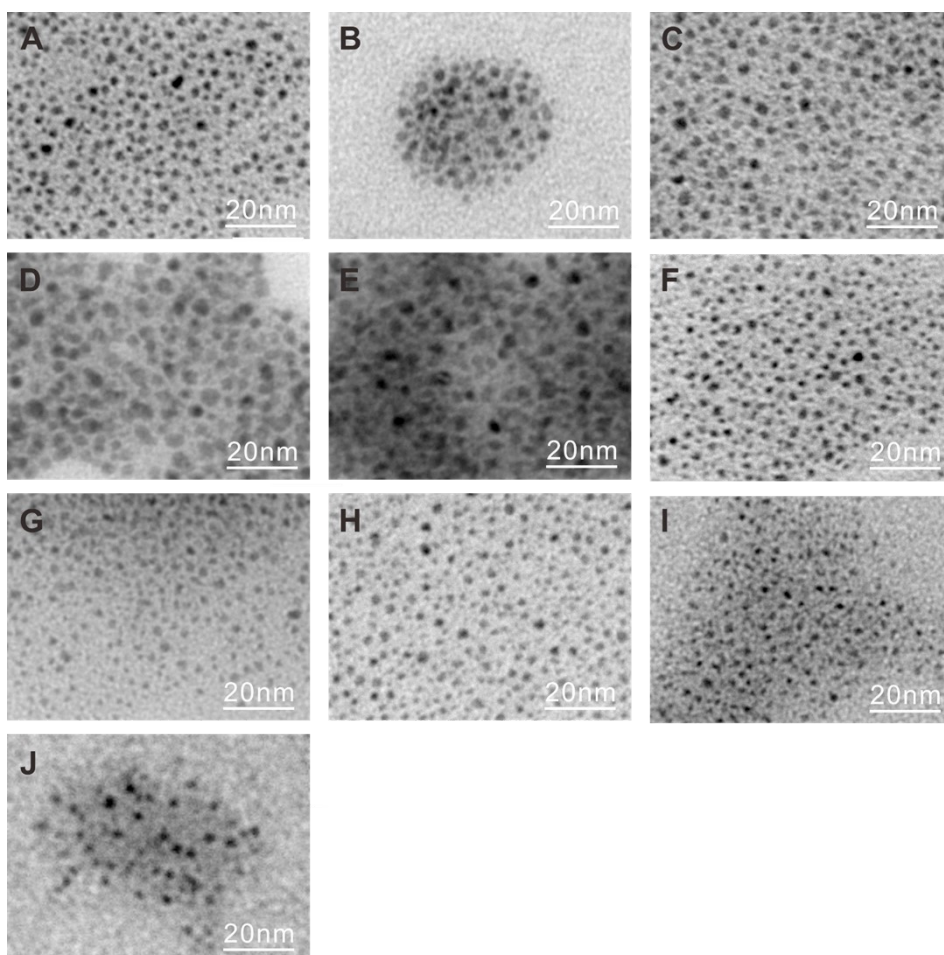

**Fig S10. TEM images of reverse synthesized GSH-AuNC.**

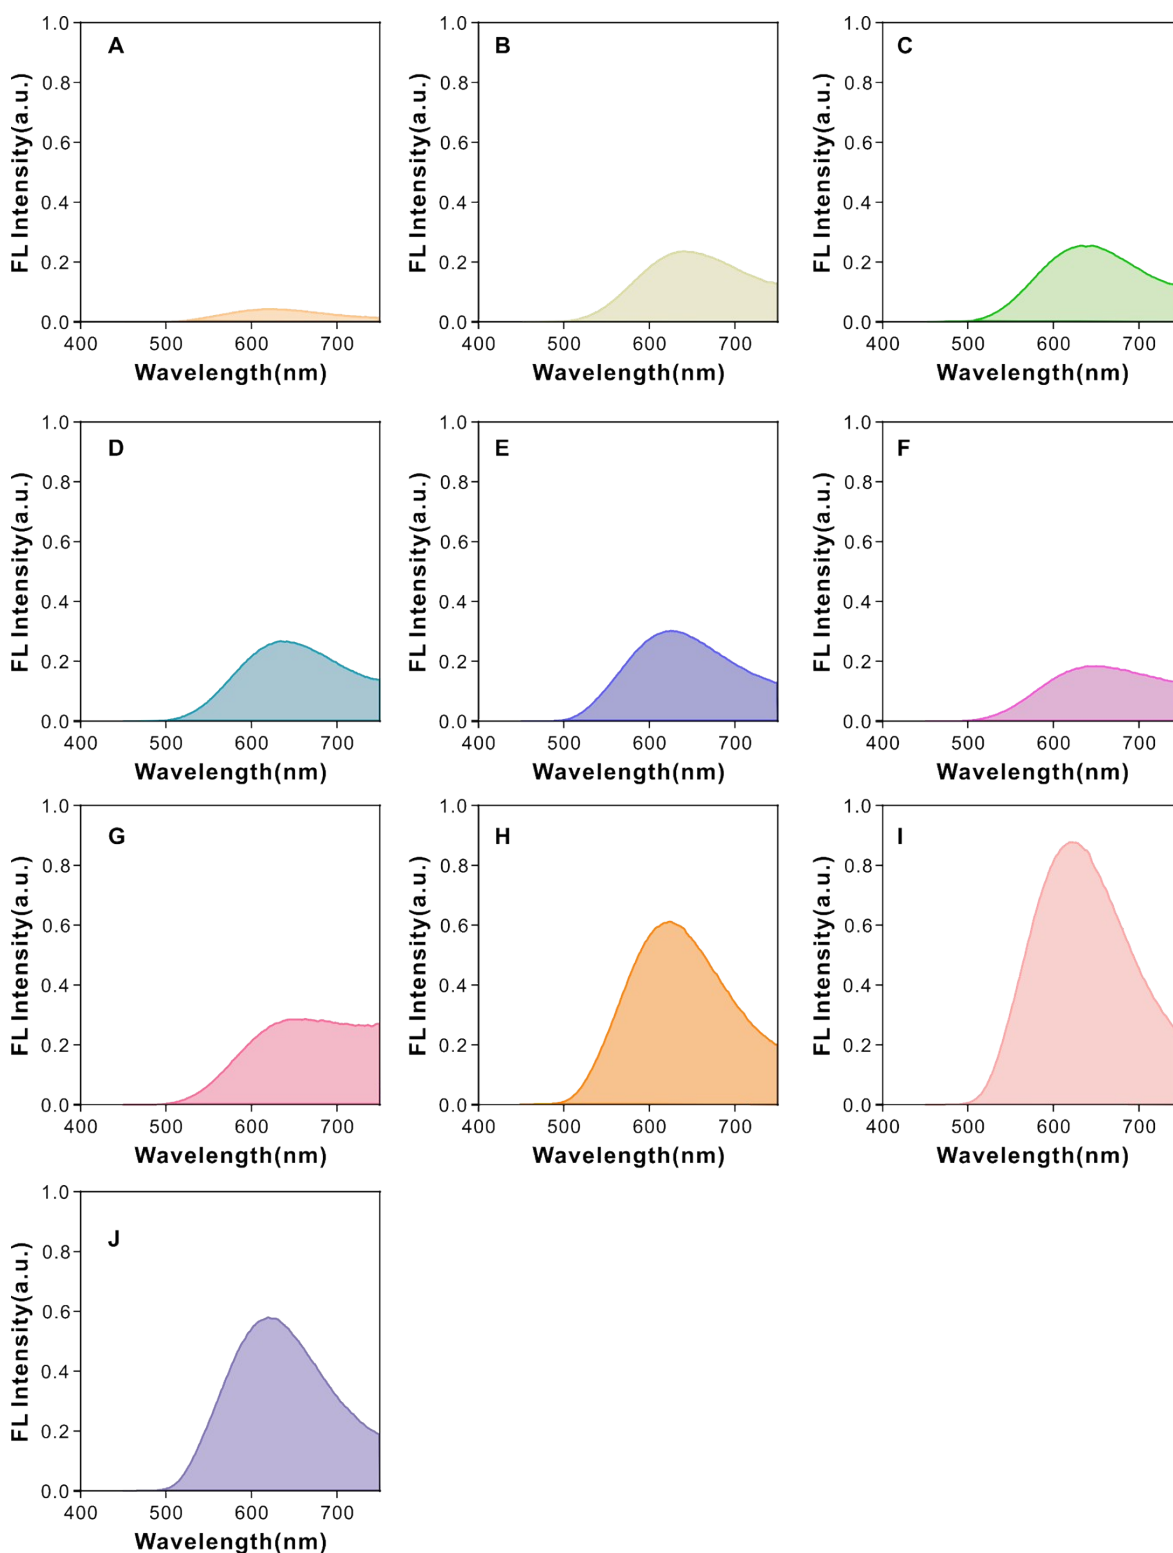

**Fig S11. Fluorescence spectrum of reverse synthesized GSH-AuNC.** The synthesis parameters are as follows:  $C_{GSH}/C_{Au^{3+}}=1.9$ ,  $T=90^{\circ}\text{C}$ ,  $t=6\text{h}$ (A);  $C_{GSH}/C_{Au^{3+}}=1.25$ ,  $T=70^{\circ}\text{C}$ ,  $t=24\text{h}$ (B);  $C_{GSH}/C_{Au^{3+}}=1.5$ ,  $T=90^{\circ}\text{C}$ ,  $t=8\text{h}$ (C);  $C_{GSH}/C_{Au^{3+}}=1.4$ ,  $T=75^{\circ}\text{C}$ ,  $t=20\text{h}$ (D);  $C_{GSH}/C_{Au^{3+}}=1.85$ ,  $T=75^{\circ}\text{C}$ ,  $t=16\text{h}$ (E);  $C_{GSH}/C_{Au^{3+}}=1.5$ ,  $T=80^{\circ}\text{C}$ ,  $t=5\text{h}$ (F);  $C_{GSH}/C_{Au^{3+}}=1.35$ ,  $T=85^{\circ}\text{C}$ ,  $t=2\text{h}$ (G);  $C_{GSH}/C_{Au^{3+}}=1.95$ ,  $T=85^{\circ}\text{C}$ ,  $t=10\text{h}$ (H);  $C_{GSH}/C_{Au^{3+}}=1.8$ ,  $T=95^{\circ}\text{C}$ ,  $t=8\text{h}$ (I);  $C_{GSH}/C_{Au^{3+}}=1.85$ ,  $T=95^{\circ}\text{C}$ ,  $t=4\text{h}$ (J).

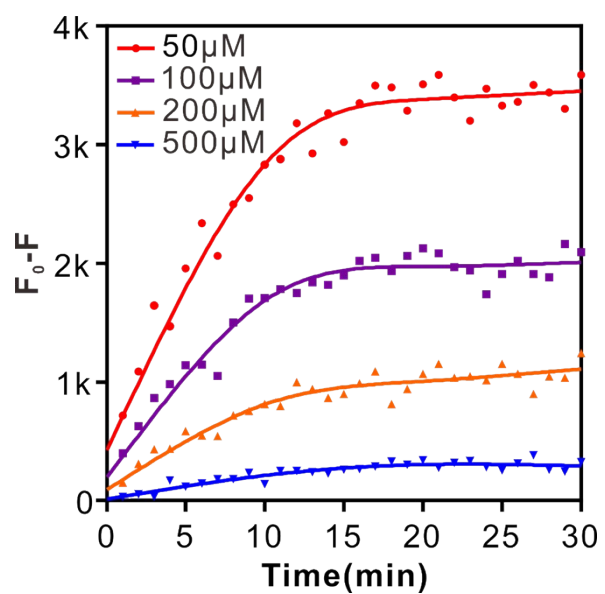

**Fig S12.** Kinetic process of the fluorescence intensity change ( $F_0-F$ ) of AuNCs at 625 nm after adding different concentrations of  $\text{Cu}^{2+}$  (50  $\mu\text{M}$ , 100  $\mu\text{M}$ , 200  $\mu\text{M}$ , 500  $\mu\text{M}$ ).

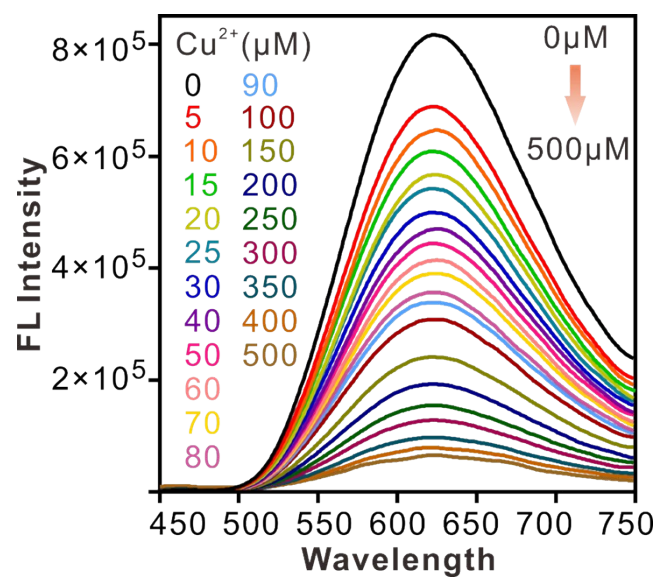

Fig S13. Fluorescence spectra of AuNCs after adding different concentrations of Cu<sup>2+</sup>, respectively.

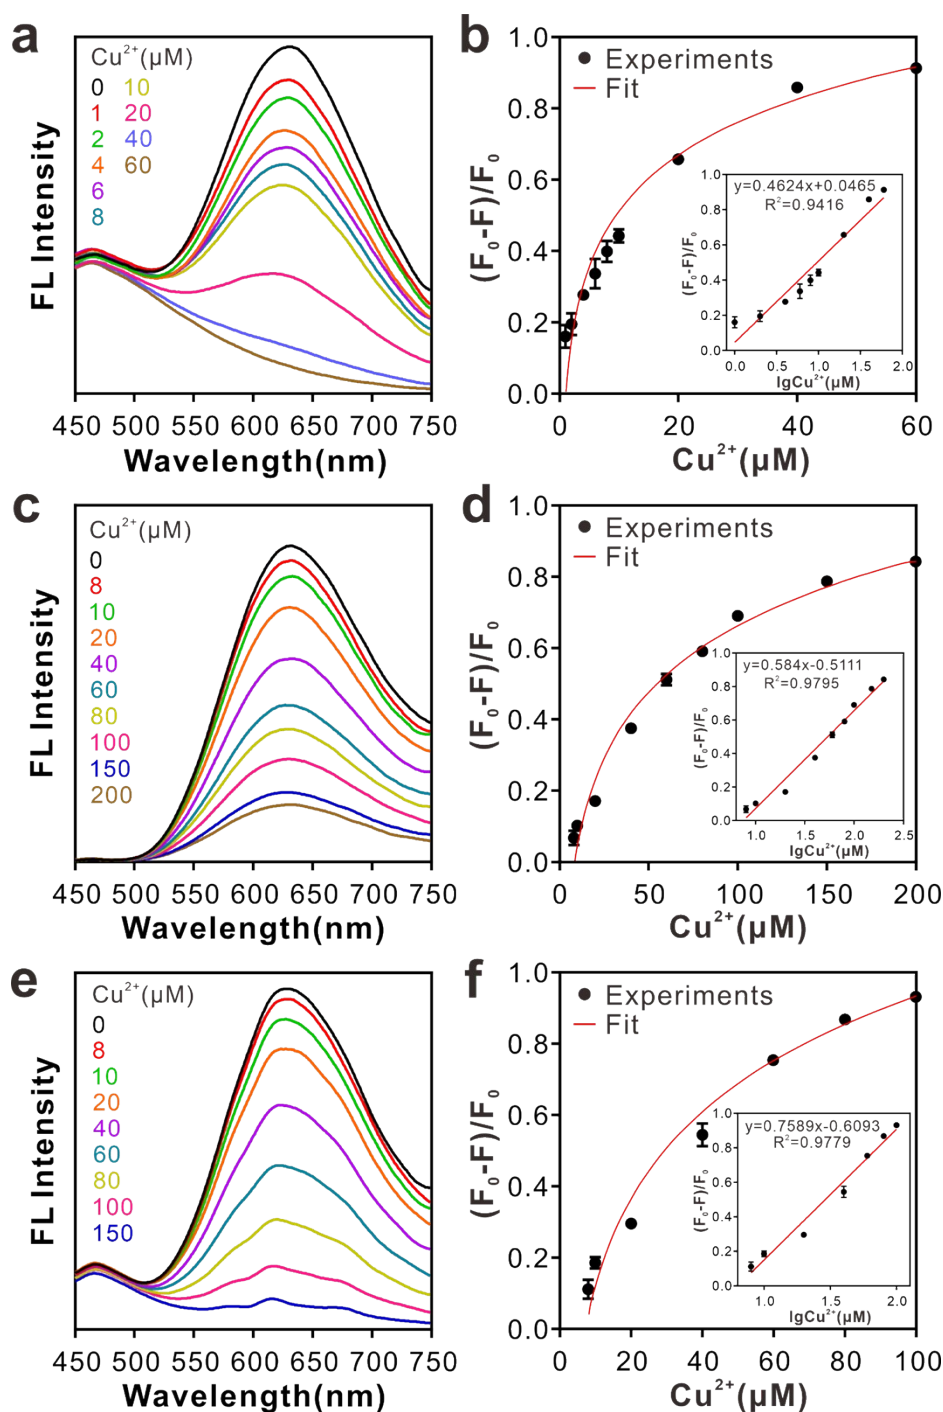

**Fig S14. The detection performance of GSH-AuNCs with high fluorescence QY for  $\text{Cu}^{2+}$  in different body fluids.** (a) Fluorescence spectra of AuNCs after adding AuNCs to the cerebrospinal fluid containing different concentrations of  $\text{Cu}^{2+}$ . (b) Curve fitting of the fluorescence intensity change rate  $((F_0-F)/F_0)$  of AuNCs at 625 nm versus  $\text{Cu}^{2+}$  concentration. Inset: Linear fitting of the rate of change in fluorescence intensity  $((F_0-F)/F_0)$ . (c) Fluorescence spectra of AuNCs after adding AuNCs to saliva containing different concentrations of  $\text{Cu}^{2+}$ . (d) Curve fitting of the fluorescence intensity change rate  $((F_0-F)/F_0)$  of AuNCs at 625 nm versus  $\text{Cu}^{2+}$  concentration. Inset: Linear fitting of the rate of change in fluorescence intensity  $((F_0-F)/F_0)$ . (e) Fluorescence spectra of AuNCs after adding AuNCs to sweat containing different concentrations of  $\text{Cu}^{2+}$ . (f) Curve fitting of the fluorescence intensity change rate  $((F_0-F)/F_0)$  of AuNCs at 625 nm versus  $\text{Cu}^{2+}$  concentration. Inset: Linear fitting of the rate of change in fluorescence intensity  $((F_0-F)/F_0)$ .

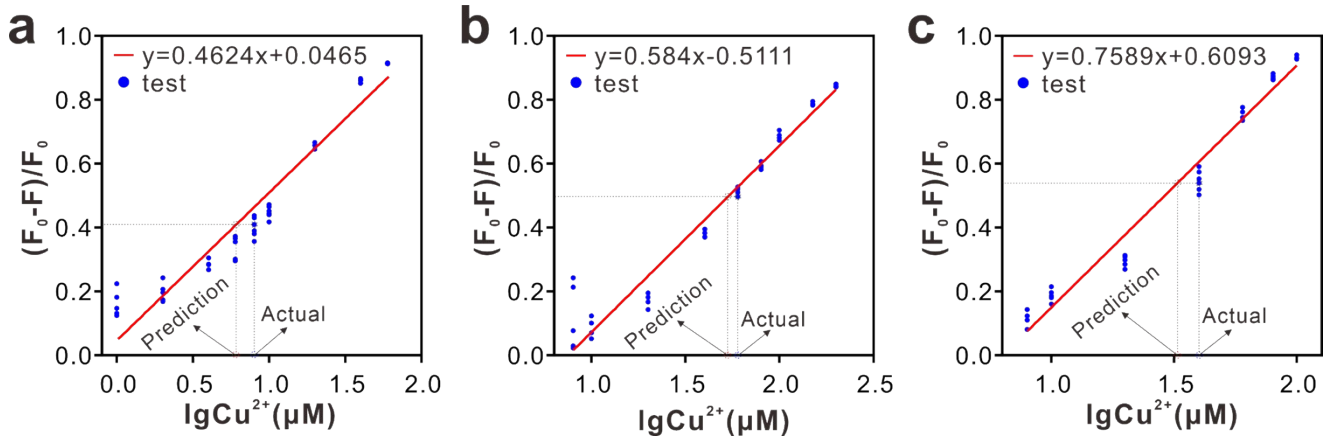

**Fig S15. The predictive performance of the linear fit for bodily fluid samples containing unknown  $\text{Cu}^{2+}$  concentrations.** (a) The predictive performance of the linear fit for cerebrospinal fluid samples containing unknown  $\text{Cu}^{2+}$  concentrations. (b) The predictive performance of the linear fit for saliva samples containing unknown  $\text{Cu}^{2+}$  concentrations. (c) The predictive performance of the linear fit for sweat samples containing unknown  $\text{Cu}^{2+}$  concentrations.



**Table S1. Data description of the input parameters.**

| <b>Parameter</b>           | <b>Notation</b>       | <b>Unit</b> | <b>Min</b> | <b>Max</b> | <b>Increment</b> |
|----------------------------|-----------------------|-------------|------------|------------|------------------|
| Reaction temperature       | $T$                   | °C          | 70         | 95         | 5                |
| Thiol-to-metal molar ratio | $C_{GSH}/C_{Au^{3+}}$ | -           | 1          | 2          | 0.1              |
| Reaction time              | $t$                   | h           | 1          | 24         | 1                |

**Table S2. The input synthetic parameter variables of phase diagram.**

| <b>Parameter</b>           | <b>Notation</b>       | <b>Unit</b> | <b>Min</b> | <b>Max</b> | <b>Increment</b> |
|----------------------------|-----------------------|-------------|------------|------------|------------------|
| Reaction temperature       | $T$                   | °C          | 70         | 95         | 5                |
| Thiol-to-metal molar ratio | $C_{GSH}/C_{Au^{3+}}$ | -           | 1          | 2          | 0.01             |
| Reaction time              | $t$                   | h           | 1          | 24         | 0.23             |
